# Supplementary figures and images for: On the recognition of chloride, bromide and nitrate anions by anthracene–squaramide conjugated compounds: a computational perspective
Source: Royal Society of Chemistry journal article supplement (doi:10.1039/d0nj03685d), 2020-01-01

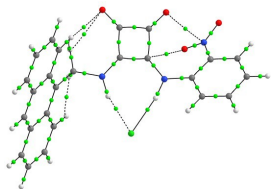

**6-Cl<sup>-</sup>**

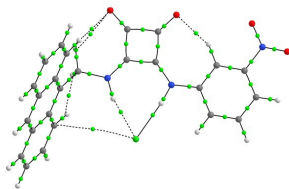

**7-Cl<sup>-</sup>**

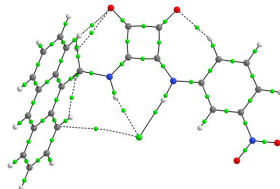

**8-Cl<sup>-</sup>**

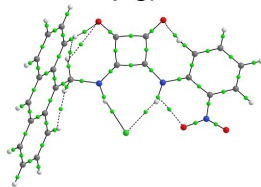

**9-Cl<sup>-</sup>**

Supplement: d0nj03685d10.pdf [file d0nj03685d10.pdf]

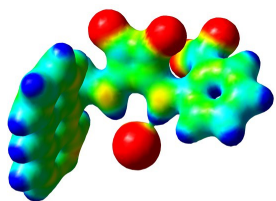

6-Cl<sup>-</sup>

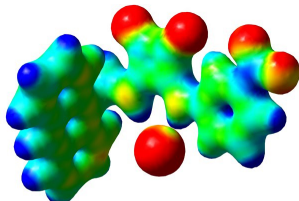

7-Cl<sup>-</sup>

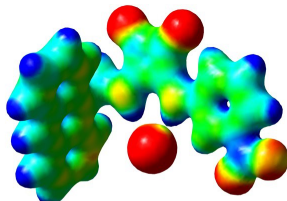

8-Cl<sup>-</sup>

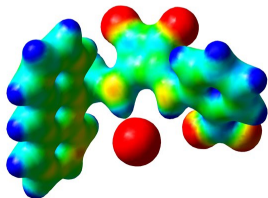

9-Cl<sup>-</sup>

Supplement: d0nj03685d5.pdf [file d0nj03685d5.pdf]

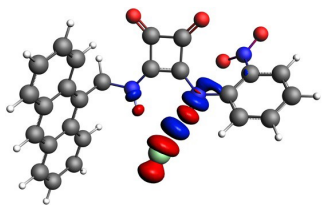

**6-Cl<sup>-</sup>**

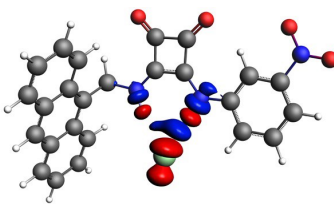

**7-Cl<sup>-</sup>**

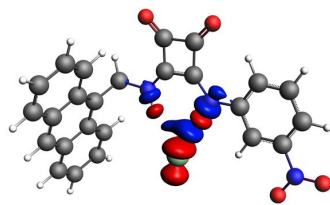

**8-Cl<sup>-</sup>**

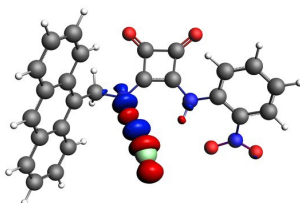

**9-Cl<sup>-</sup>**

**(a)**

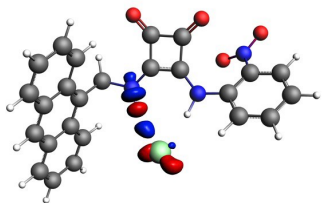

**6-Cl<sup>-</sup>**

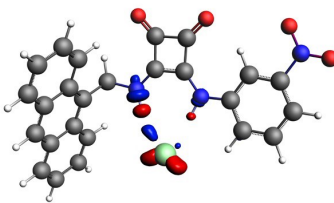

**7-Cl<sup>-</sup>**

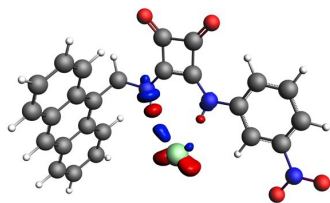

**8-Cl<sup>-</sup>**

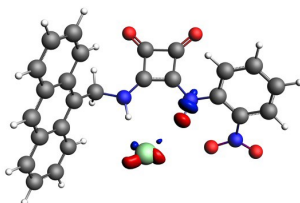

**9-Cl<sup>-</sup>**

**(b)**

Supplement: d0nj03685d8.pdf [file d0nj03685d8.pdf]
